# Supplementary material for: Ultrafast photochemical processes in 1,2-dichloroethene measured with a universal XUV probe
Source: Royal Society of Chemistry journal article supplement (doi:10.1039/d4cp02952f), 2024-01-01
Supplement: d4cp02952f7.pdf [file d4cp02952f7.pdf]

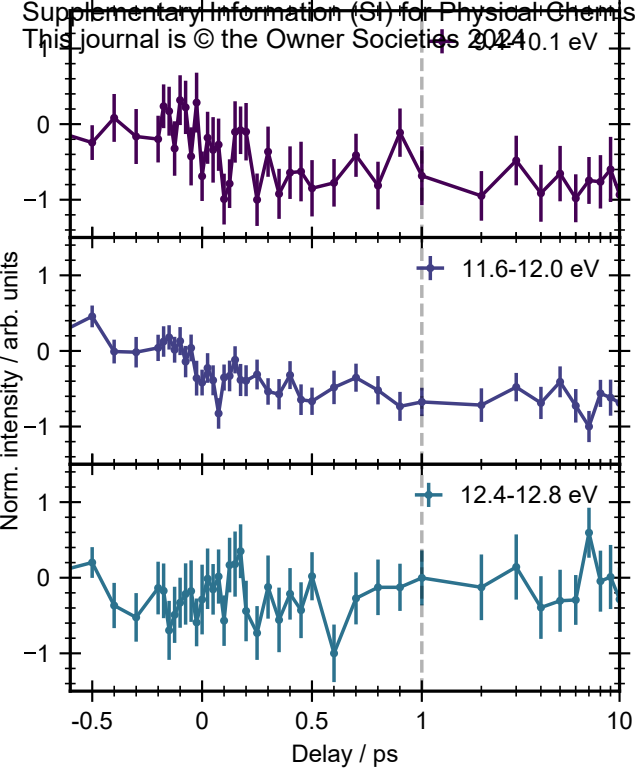**(a)**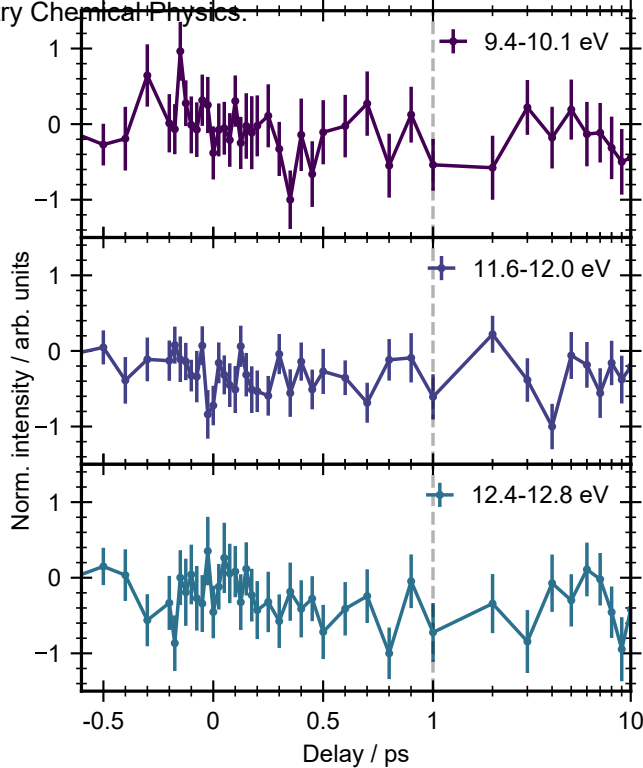**(b)**
