# Supplementary material for: Ultrafast photochemical processes in 1,2-dichloroethene measured with a universal XUV probe
Source: Royal Society of Chemistry journal article supplement (doi:10.1039/d4cp02952f), 2024-01-01
Supplement: d4cp02952f10.pdf [file d4cp02952f10.pdf]

## Supplementary Information

Henry G. McGhee, Henry J. Thompson, James Thompson,  
Yu Zhang, Adam S. Wyatt, Emma Springate, Richard T. Chapman,  
Rebecca A. Ingle, Daniel A. Horke, Russell S. Minns, Michael A. Parkes

*Department of Chemistry, University College London, 20 Gordon Street, London, WC1H 0AJ, UK*

E-mail: [michael.parkes@ucl.ac.uk](mailto:michael.parkes@ucl.ac.uk)

# 1 Calculated Geometry

| Atom | X / Bohr     | Y / Bohr     | Z / Bohr |
|------|--------------|--------------|----------|
| C    | 0.493660842  | 0.442675934  | 0        |
| H    | 0.334309043  | 1.509306884  | 0        |
| C    | -0.493660842 | -0.442675934 | 0        |
| H    | -0.334309043 | -1.509306884 | 0        |
| Cl   | -2.144621671 | 0.048817983  | 0        |
| Cl   | 2.144621671  | -0.048817983 | 0        |

Table S1: Optimised structure for *trans*-1,2-dichloroethene from a CCSD calculation with a 6-311G++(3df, 3pd) basis.

| Atom | X / Bohr   | Y / Bohr | Z / Bohr   |
|------|------------|----------|------------|
| C    | 0          | 0        | 0          |
| H    | 0          | 0        | 1.0792497  |
| C    | 1.1533616  | 0        | -0.6696234 |
| Cl   | -1.5402877 | 0        | -0.7320455 |
| Cl   | 1.2812994  | 0        | -2.3702141 |
| H    | 2.0906222  | 0        | -0.1345322 |

Table S2: Optimised structure for *cis*-1,2-dichloroethene from a CCSD calculation with a 6-311G++(3df, 3pd) basis.

## 2 Vibrational Analysis

| Symmetry | Calc / $\text{cm}^{-1}$ | NIST / $\text{cm}^{-1}$ | Period / fs | Character   |
|----------|-------------------------|-------------------------|-------------|-------------|
| 1 $A_u$  | 216.15                  | 227                     | 147         | Torsion     |
| 2 $B_u$  | 243.09                  | 250                     | 133         | CCCl deform |
| 3 $A_g$  | 361.43                  | 350                     | 95          | CCCl deform |
| 4 $B_g$  | 798.56                  | 763                     | 44          | CH bend     |
| 5 $B_u$  | 861.23                  | 828                     | 40          | CCl str     |
| 6 $A_g$  | 886.05                  | 846                     | 39          | CCl str     |
| 7 $A_u$  | 942.87                  | 900                     | 37          | CH bend     |
| 8 $B_u$  | 1242.95                 | 1200                    | 28          | CH bend     |
| 9 $A_g$  | 1318.17                 | 1274                    | 26          | CH bend     |
| 10 $A_g$ | 1677.01                 | 1578                    | 21          | CC str      |
| 11 $B_u$ | 3251.41                 | 3073                    | 11          | CH str      |
| 12 $A_g$ | 3253.76                 | 3090                    | 11          | CH str      |

Table S3: Calculated Frequencies for *trans*-1,2-dichloroethene from a CCSD calculation with a 6-311G++(3df, 3pd) basis. Experimental values taken from NIST webbook<sup>1</sup>

| Symmetry | Calc / $\text{cm}^{-1}$ | NIST / $\text{cm}^{-1}$ | Period / fs | Character   |
|----------|-------------------------|-------------------------|-------------|-------------|
| 1 $A_1$  | 172.56                  | 173                     | 193         | CCCl deform |
| 2 $A_2$  | 421.04                  | 406                     | 82          | Torsion     |
| 3 $B_1$  | 589.81                  | 571                     | 58          | CCCl deform |
| 4 $B_2$  | 720.82                  | 697                     | 48          | CH bend     |
| 5 $A_1$  | 760.19                  | 711                     | 47          | CCl str     |
| 6 $B_1$  | 902.92                  | 857                     | 39          | CCl str     |
| 7 $A_2$  | 905.75                  | 876                     | 38          | CH bend     |
| 8 $A_1$  | 1233.8                  | 1179                    | 28          | CH bend     |
| 9 $B_1$  | 1343.76                 | 1303                    | 25          | CH bend     |
| 10 $A_1$ | 1662.24                 | 1587                    | 21          | CC str      |
| 11 $B_1$ | 3229.88                 | 3072                    | 11          | CH str      |
| 12 $A_1$ | 3252.34                 | 3077                    | 11          | CH str      |

Table S4: Calculated Frequencies for *cis*-1,2-dichloroethene from a CCSD calculation with a 6-311G++(3df, 3pd) basis. Experimental values taken from NIST webbook<sup>1</sup>

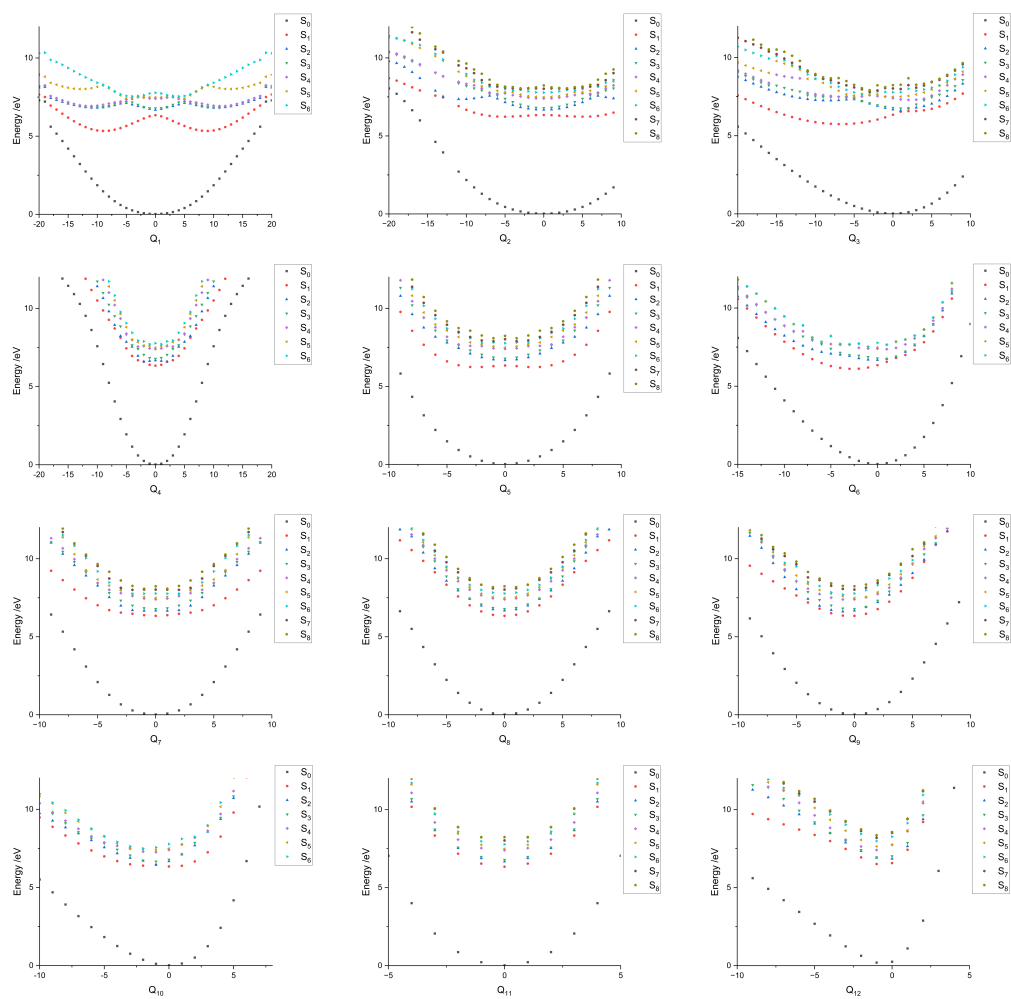

Figure S1: Cuts through the potential energy surface of *trans*-1,2-dichloroethene along mass-weighted normal modes. Calculated using EOM-CCSD/6-311G++(3df,3pd) in QChem. The number of the mode is indicated in the x-axis label.

### 3 Ionization Energies

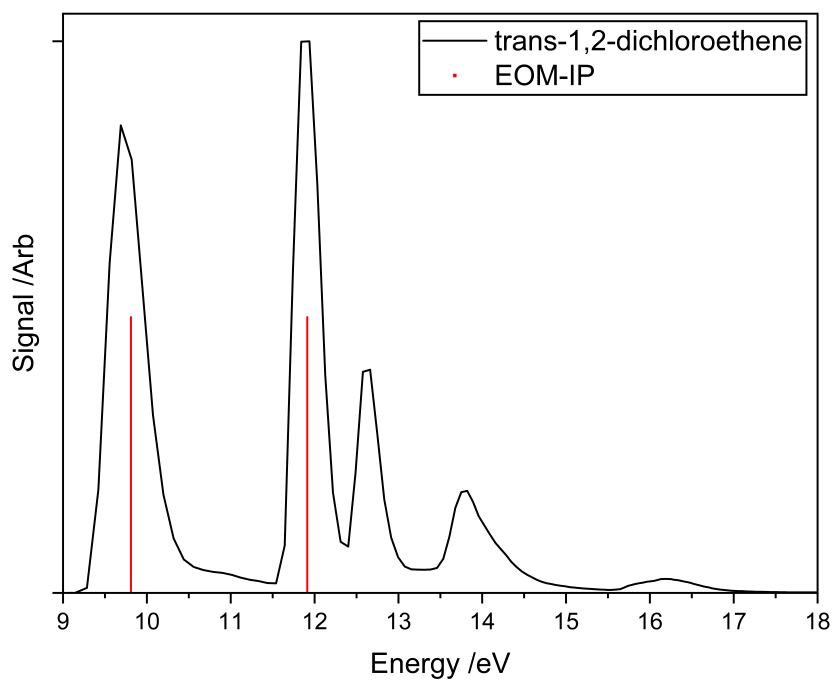

Figure S2: Comparison of our *trans*-1,2-dichloroethene XUV photoelectron spectrum at 21.64 eV with calculated ionization energies using EOM-CCSD with a 6-311G++(3df, 3pd) basis set

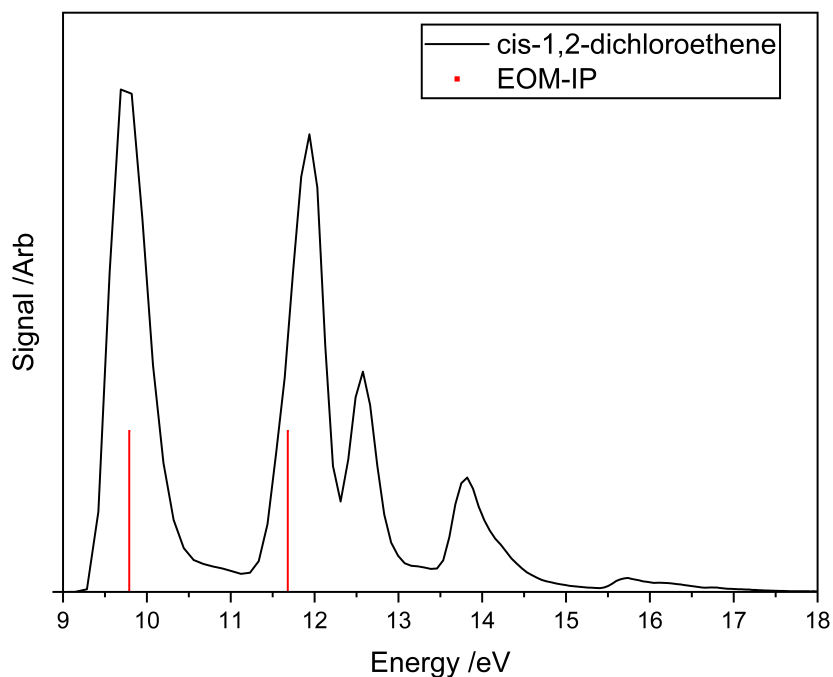

Figure S3: Comparison of our *cis*-1,2-dichloroethene XUV photoelectron spectrum at 21.64 eV with calculated ionization energies using EOM-CCSD with a 6-311G++(3df, 3pd) basis set

## 4 Photoabsorption

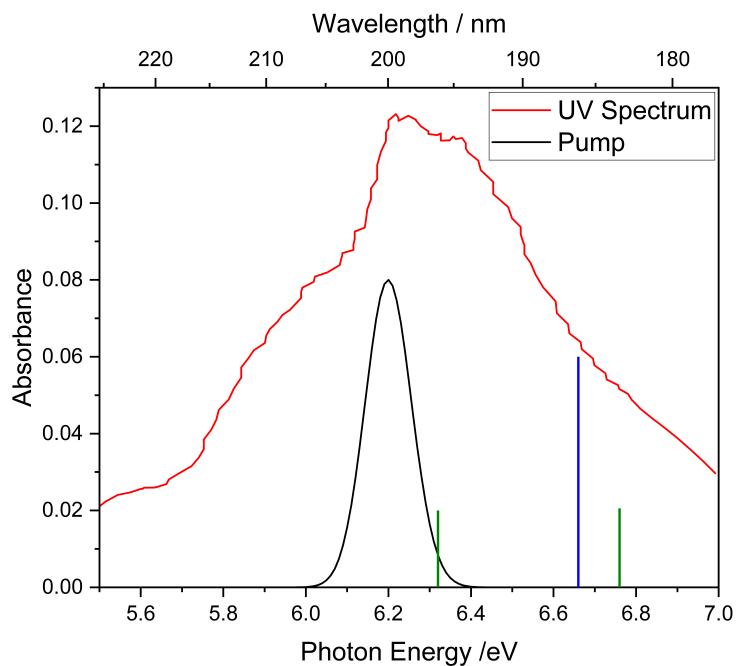

Figure S4: UV-vis spectrum of *trans*-1,2-dichloroethene taken from Locht *et al.*,<sup>2</sup> shown with position of pump pulse (black Gaussian) and the calculated positions of the first three excited states from EOM-CCSD calculations. The green lines are for states with no or very low oscillator strengths

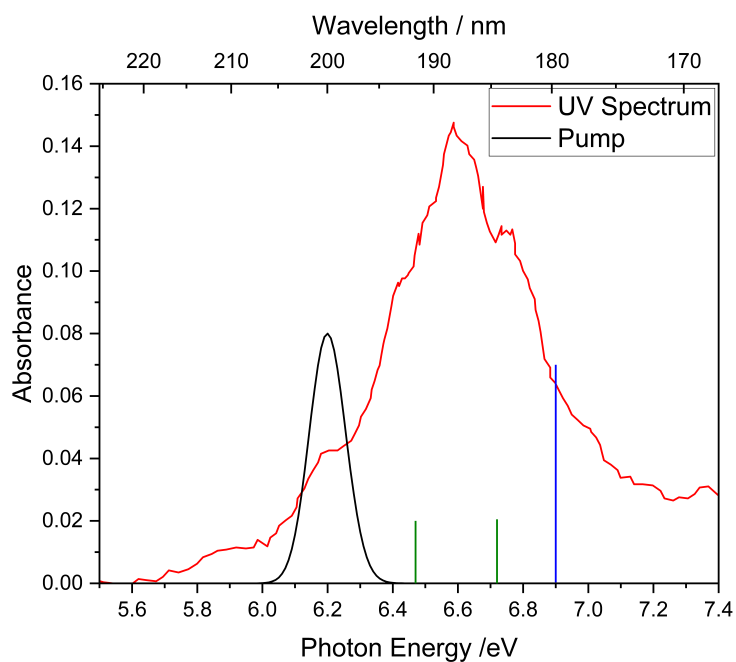

Figure S5: UV-vis spectrum of *cis*-1,2-dichloroethene taken from Locht *et al.*,<sup>3</sup> shown with position of pump pulse (black Gaussian) and the calculated positions of the first three excited states from EOM-CCSD calculations. The green lines are for states with no or very low oscillator strengths

## 5 *Cis*-1,2-dichloroethene time resolved photoelectron spectroscopy results

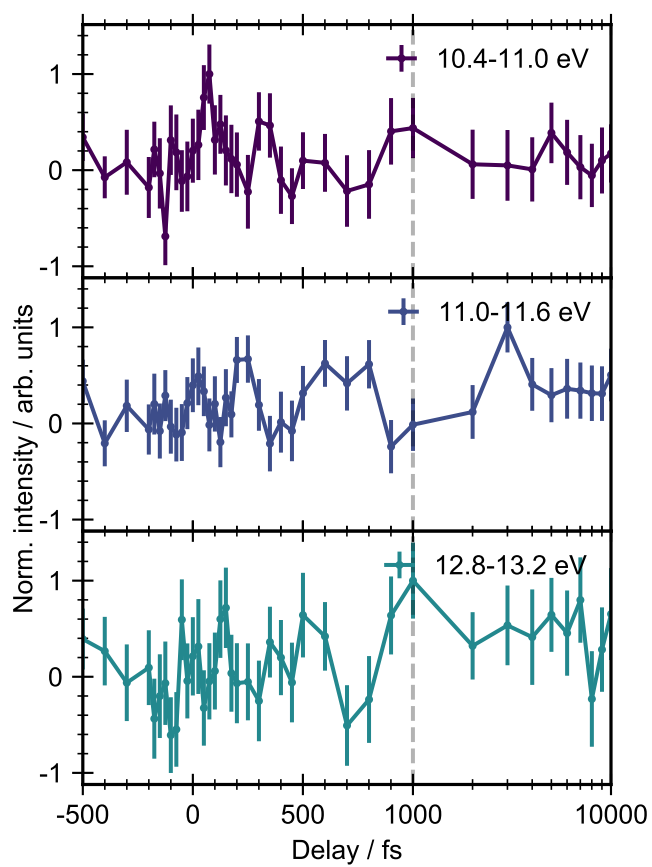

Figure S6: Integrated kinetic traces for the expected photoproduct regions (10.4-11.0, 11.0-11.6 eV and 12.8-13.2 eV) for *cis*-1,2-dichloroethene. No signal is observed above the noise level.

## 6 Bleach Signals

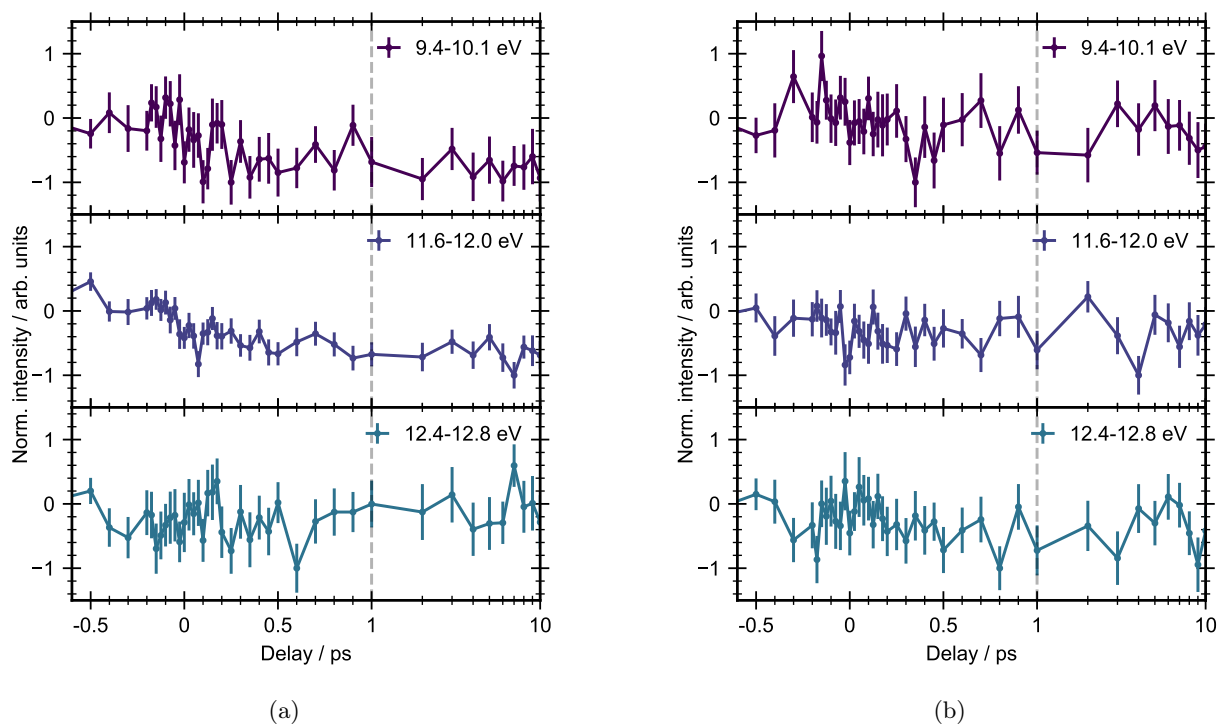

Figure S7: Integrated kinetic traces of the ground state bleach features for the first (9.4-10.1 eV), second (11.6-12.0 eV) and third (12.4-12.8 eV) ionisation potentials for (a) *trans*-1,2-dichloroethene and (b) *cis*-1,2-dichloroethene. The delay axis is plotted on a log scale for values greater than 1 ps.



## 7 Cl region

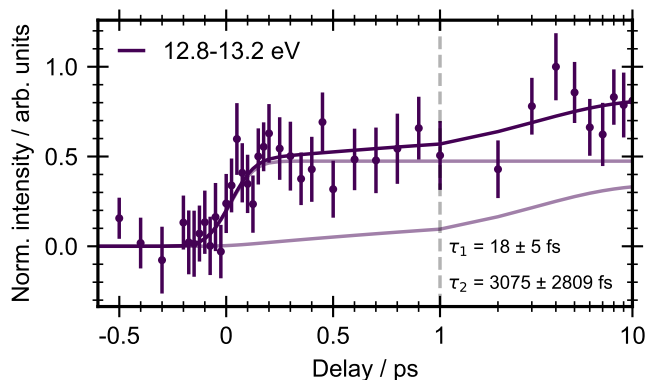

## 8 C<sub>2</sub>HCl region

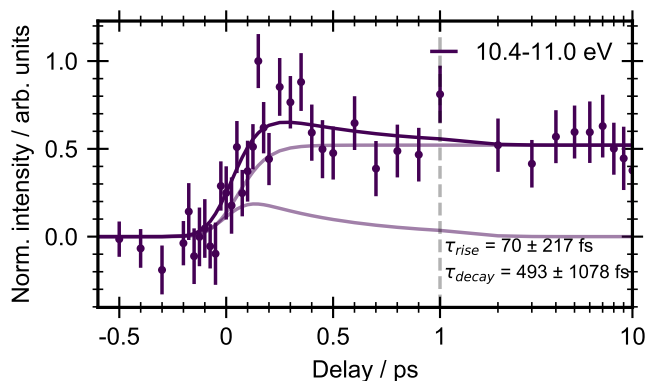

## References

- [1] *NIST Chemistry WebBook, NIST Standard Reference Database Number 69*, ed. P. J. Linstrom and W. G. Mallard, National Institute of Standards and Technology, Gaithersburg MD, 20899, retrieved 2021.
- [2] R. Locht, D. Dehareng and B. Leyh, *J. Quant. Spec. Rad. Trans.*, 2020, **251**, 107048.
- [3] R. Locht, D. Dehareng and B. Leyh, *AIP Adv.*, 2019, **9**, 015305.
